# Supplementary material for: Cross-sectional study of diet, physical activity, television viewing and sleep duration in 233 110 adults from the UK Biobank; the behavioural phenotype of cardiovascular disease and type 2 diabetes
Source: PubMed Central journal article supplement (PMC4800116; doi:10.1136/bmjopen-2015-010038), 2016-03-15
Supplement: bmjopen-2015-010038supp.pdf [file bmjopen-2015-010038supp.pdf]

## Online Supplement 1 Diseases included in the 'CVD' group

hypertension  
heart/cardiac problem  
peripheral vascular disease  
venous thromboembolic disease  
essential hypertension  
gestational hypertension/pre-eclampsia  
angina  
heart attack/myocardial infarction  
heart failure/pulmonary odema  
heart arrhythmia  
heart valve problem/heart murmur  
cardiomyopathy  
pericardial problem  
stroke  
transient ischaemic attack (tia)  
subdural haemorrhage/haematoma  
subarachnoid haemorrhage  
leg claudication/ intermittent claudication  
arterial embolism  
pulmonary embolism +/- dvt  
deep venous thrombosis (dvt)  
peripheral neuropathy  
ischaemic stroke  
mitral valve disease  
mitral regurgitation / incompetence  
aortic valve disease  
aortic regurgitation / incompetence  
hypertrophic cardiomyopathy (hcm / hocm)  
pericarditis  
pericardial effusion  
aortic aneurysm rupture  
aortic dissection  
aortic stenosis  
brain haemorrhage

**Online supplement 2**

**General characteristics and lifestyle behaviours of the 'Other diseases' group (n=203,700) who were excluded from analysis.** Data shown in red for n=167,810 individuals who had information on physical activity, sitting and sleep behaviours.

|                                                          | <b>% within each disease group</b>      |                                  |                                                       |                                                   |                                               |
|----------------------------------------------------------|-----------------------------------------|----------------------------------|-------------------------------------------------------|---------------------------------------------------|-----------------------------------------------|
|                                                          | <b>No Disease</b><br><i>(n=103,993)</i> | <b>CVD</b><br><i>(n=113,469)</i> | <b>Type 2 diabetes without CVD</b><br><i>(n=4074)</i> | <b>Type 2 diabetes + CVD</b><br><i>(n=11,574)</i> | <b>'Other diseases'</b><br><i>(n=167,810)</i> |
| <b>SOCIO-DEMOGRAPHICS</b>                                |                                         |                                  |                                                       |                                                   |                                               |
| <b>% Male</b>                                            | 47.0                                    | 53.3                             | 63.6                                                  | 68.0                                              | <b>42.2</b>                                   |
| <b>Age (n)</b>                                           | <i>103,993</i>                          | <i>113,469</i>                   | <i>4074</i>                                           | <i>11,574</i>                                     | <b>167,810</b>                                |
| 60-73                                                    | 28.6                                    | 57.4                             | 53.9                                                  | 66.4                                              | <b>38.5</b>                                   |
| <b>BMI (n)</b>                                           | <i>103,443</i>                          | <i>112,852</i>                   | <i>4048</i>                                           | <i>11,478</i>                                     | <b>167163</b>                                 |
| ≥30 (obese)                                              | 15.0                                    | 33.6                             | 44.6                                                  | 60.0                                              | <b>18.8</b>                                   |
| <b>Townsend deprivation quintile (%)</b>                 | <i>103,861</i>                          | <i>113,323</i>                   | <i>4070</i>                                           | <i>11,557</i>                                     | <b>167,598</b>                                |
| 5 (most deprived)                                        | 17.1                                    | 20.5                             | 25.1                                                  | 28.5                                              | <b>18.2</b>                                   |
| <b>DIET</b>                                              |                                         |                                  |                                                       |                                                   |                                               |
| <b>Dietary change in past 5 yrs</b>                      | <i>103,902</i>                          | <i>113,300</i>                   | <i>4070</i>                                           | <i>11,555</i>                                     | <b>167,620</b>                                |
| YES                                                      | 28.9                                    | 45.9                             | 75.5                                                  | 75.3                                              | <b>37.5</b>                                   |
| <b>PHYSICAL ACTIVITY</b>                                 |                                         |                                  |                                                       |                                                   |                                               |
| <b>Total Physical activity<sup>a</sup> (MET.mins/wk)</b> | <i>103,993</i>                          | <i>113,469</i>                   | <i>4074</i>                                           | <i>11,574</i>                                     | <b>167,810</b>                                |
| ≤918 (Low physical activity)                             | 25.0                                    | 30.5                             | 35.4                                                  | 40.1                                              | <b>28.2</b>                                   |
| >918-1902                                                | 25.0                                    | 24.2                             | 22.5                                                  | 22.2                                              | <b>24.4</b>                                   |
| >1902-3706                                               | 25.0                                    | 22.2                             | 20.7                                                  | 19.7                                              | <b>23.7</b>                                   |
| >3706-19278 (High physical activity)                     | 25.0                                    | 23.2                             | 21.3                                                  | 18.0                                              | <b>23.8</b>                                   |
| <b>TV VIEWING</b>                                        |                                         |                                  |                                                       |                                                   |                                               |
| <b>TV viewing<sup>a</sup> (hours/day)</b>                | <i>103,993</i>                          | <i>113,469</i>                   | <i>4074</i>                                           | <i>11,574</i>                                     | <b>167,810</b>                                |
| ≤1 (Low TV viewing)                                      | 26.6                                    | 16.2                             | 15.4                                                  | 10.5                                              | <b>23.1</b>                                   |
| >1-2                                                     | 30.5                                    | 24.5                             | 22.3                                                  | 19.3                                              | <b>28.2</b>                                   |
| >2-3                                                     | 22.6                                    | 24.5                             | 24.1                                                  | 22.8                                              | <b>23.1</b>                                   |
| >3 (High TV viewing)                                     | 20.3                                    | 34.8                             | 38.1                                                  | 47.3                                              | <b>25.6</b>                                   |
| <b>SLEEP</b>                                             |                                         |                                  |                                                       |                                                   |                                               |
| <b>Sleep duration<sup>c</sup> (hours/night)</b>          | <i>103,993</i>                          | <i>113,469</i>                   | <i>4074</i>                                           | <i>11,574</i>                                     | <b>167,810</b>                                |
| <7 (Poor sleep duration)                                 | 21.3                                    | 26.4                             | 27.0                                                  | 27.5                                              | <b>24.0</b>                                   |
| 7-8 (Good sleep duration)                                | 73.4                                    | 64.6                             | 62.1                                                  | 58.6                                              | <b>68.6</b>                                   |
| >8 (Poor sleep duration)                                 | 5.3                                     | 9.1                              | 10.8                                                  | 13.9                                              | <b>7.3</b>                                    |
| <b>BEHAVIOURAL PHENOTYPE</b>                             |                                         |                                  |                                                       |                                                   |                                               |
| UNHEALTHY                                                | 1.8                                     | 5.2                              | 5.8                                                   | 10.0                                              | <b>3.1</b>                                    |
| HEALTHY                                                  | 4.5                                     | 2.4                              | 1.9                                                   | 1.2                                               | <b>3.5</b>                                    |

**Online supplement 3**

**Prevalance data and logistic regression analysis for Total frequency and Total duration of physical activity from the UK Biobank questionnaire.** *Total frequency was calculated as the days for walking+moderate+activity and total duration was calculated as the minutes for walking+moderate+vigorous activity.*

**TOTAL FREQUENCY**

A-proportion attaining physical activity quartiles in each disease group

|                                                 | <b>HEALTHY</b> | <b>CVD</b> | <b>Type 2 diabetes without CVD</b> | <b>Type 2 diabetes +CVD</b> |
|-------------------------------------------------|----------------|------------|------------------------------------|-----------------------------|
| <b>Total frequency physical activity (days)</b> | 103,993        | 113,469    | 4074                               | 11,574                      |
| ≤7 (Low physical activity)                      | 25.4           | 30.6       | 33.9                               | 38.9                        |
| >7-11                                           | 28.7           | 28.0       | 27.5                               | 25.7                        |
| >11-14                                          | 21.5           | 21.0       | 20.1                               | 19/6                        |
| >14 (High physical activity)                    | 24.4           | 20.3       | 18.5                               | 15.8                        |

B-Odds of reporting unhealthy behaviours

|                                    | <b>Low physical activity</b> | <b>High sitting time [TV viewing]</b> | <b>Poor sleep</b>   | <b>Low Physical Activity + High Sitting + Poor Sleep</b> |
|------------------------------------|------------------------------|---------------------------------------|---------------------|----------------------------------------------------------|
| <b>No Disease</b>                  | 1.00                         | 1.00                                  | 1.00                | 1.00                                                     |
| <b>CVD</b>                         | 1.23 (1.21 to 1.26)          | 1.42 (1.39 to 1.45)                   | 1.37 (1.34 to 1.39) | 2.11 (1.99-2.23)                                         |
| <b>Type 2 diabetes without CVD</b> | 1.34 (1.25 to 1.44)          | 1.59 (1.49 to 1.69)                   | 1.38 (1.30 to 1.47) | 2.11 (1.83-2.44)                                         |
| <b>Type 2 diabetes + CVD</b>       | 1.63 (1.56 to 1.71)          | 1.92 (1.85 to 1.99)                   | 1.52 (1.46 to 1.58) | 3.07 (2.82-3.34)                                         |

## TOTAL DURATION

### A-proportion attaining physical activity quartiles in each disease group

|                                                | HEALTHY | CVD     | Type 2 diabetes without CVD | Type 2 diabetes +CVD |
|------------------------------------------------|---------|---------|-----------------------------|----------------------|
| <b>Total duration physical activity (mins)</b> | 103,993 | 113,469 | 4074                        | 11,574               |
| ≤60 (Low physical activity)                    | 27.8    | 34.1    | 39.5                        | 44.7                 |
| >60-105                                        | 23.5    | 21.1    | 20.7                        | 19.3                 |
| >105-180                                       | 26.4    | 23.4    | 20.2                        | 19.7                 |
| >180 (High physical activity)                  | 22.3    | 21.4    | 19.6                        | 16.4                 |

### B-Odds of reporting unhealthy behaviour

|                                    | Low physical activity | High sitting time [TV viewing] | Poor sleep         | Low Physical Activity + High Sitting + Poor Sleep |
|------------------------------------|-----------------------|--------------------------------|--------------------|---------------------------------------------------|
| <b>No Disease</b>                  | 1.00                  | 1.00                           | 1.00               | 1.00                                              |
| <b>CVD</b>                         | 1.23 (1.21 to 1.26)   | 1.42 (1.39 to1.45)             | 1.37 (1.34 to1.39) | 2.12 (2.00 to 2.24)                               |
| <b>Type 2 diabetes without CVD</b> | 1.43 (1.34 to 1.53)   | 1.59 (1.49 to1.69)             | 1.38 (1.30 to1.47) | 2.13 (1.85 to 2.44)                               |
| <b>Type 2 diabetes + CVD</b>       | 1.72 (1.65 to 1.80)   | 1.92 (1.85 to 1.99)            | 1.52 (1.46 to1.58) | 3.29 (3.04 to 3.57)                               |

Online Supplement 4

**Socio-demographics of those who have missing data on physical activity, sitting or sleep and therefore excluded from analysis (n=60,938).**

|                                             | <b>% within each disease group</b>                          |                                                      |                                                                                |                                                                                 |
|---------------------------------------------|-------------------------------------------------------------|------------------------------------------------------|--------------------------------------------------------------------------------|---------------------------------------------------------------------------------|
|                                             | <b>No Disease<br/>(n=23,515)<br/><br/>20.7%<br/>missing</b> | <b>CVD<br/>(n=32,928)<br/><br/>18.4%<br/>missing</b> | <b>Type 2<br/>diabetes<br/>without CVD<br/>(n=1104)<br/><br/>22.5% missing</b> | <b>Type 2<br/>diabetes<br/>with CVD<br/>(n=3391)<br/><br/>21.3%<br/>missing</b> |
| <b>SOCIO-DEMOGRAPHICS</b>                   |                                                             |                                                      |                                                                                |                                                                                 |
| <b>% Male</b>                               | 39.2                                                        | 40.6                                                 | 53.8                                                                           | 53.0                                                                            |
| <b>Age (n)</b>                              | 23,515                                                      | 32,928                                               | 1104                                                                           | 3391                                                                            |
| 37-49                                       | 31.1                                                        | 10.4                                                 | 13.1                                                                           | 5.5                                                                             |
| 50-59                                       | 36.5                                                        | 28.9                                                 | 29.5                                                                           | 26.9                                                                            |
| 60-73                                       | 32.4                                                        | 60.7                                                 | 57.3                                                                           | 67.6                                                                            |
| <b>BMI (n)</b>                              | 22,903                                                      | 32,651                                               | 1090                                                                           | 3356                                                                            |
| <18.5-24.9<br>(under and acceptable weight) | 40.5                                                        | 20.4                                                 | 12.6                                                                           | 6.9                                                                             |
| 25-29.9 (overweight)                        | 42.1                                                        | 40.7                                                 | 37.2                                                                           | 29.8                                                                            |
| ≥30 (obese)                                 | 17.4                                                        | 39.0                                                 | 50.3                                                                           | 63.4                                                                            |
| <b>Townsend deprivation quintile (n)</b>    | 23,494                                                      | 32,892                                               | 1099                                                                           | 3387                                                                            |
| 1 (least deprived)                          | 19.4                                                        | 16.6                                                 | 15.7                                                                           | 12.1                                                                            |
| 2                                           | 18.9                                                        | 18.0                                                 | 15.2                                                                           | 14.1                                                                            |
| 3                                           | 20.0                                                        | 19.0                                                 | 18.4                                                                           | 17.6                                                                            |
| 4                                           | 19.9                                                        | 19.8                                                 | 18.7                                                                           | 22.0                                                                            |
| 5 (most deprived)                           | 21.8                                                        | 26.7                                                 | 32.0                                                                           | 34.3                                                                            |
| <b>Ethnicity (n)</b>                        | 22,828                                                      | 32,574                                               | 1092                                                                           | 3365                                                                            |
| White/British                               | 92.5                                                        | 93.8                                                 | 83.2                                                                           | 86.9                                                                            |
| Mixed                                       | 0.7                                                         | 0.5                                                  | 0.5                                                                            | 0.7                                                                             |
| Asian                                       | 2.5                                                         | 2.0                                                  | 9.8                                                                            | 6.5                                                                             |
| Black African                               | 2.2                                                         | 2.4                                                  | 3.8                                                                            | 3.8                                                                             |
| Chinese                                     | 0.6                                                         | 0.2                                                  | 0.3                                                                            | 0.2                                                                             |
| Other                                       | 1.4                                                         | 1.0                                                  | 2.4                                                                            | 1.8                                                                             |

**Online Supplement 5     Dietary data from the food frequency questionnaire across cardio-metabolic disease groups.**

|                             | % within each disease group |                    |                                               |                                           |
|-----------------------------|-----------------------------|--------------------|-----------------------------------------------|-------------------------------------------|
|                             | No Disease<br>(n=103,993)   | CVD<br>(n=113,469) | Type 2<br>diabetes<br>without CVD<br>(n=4074) | Type 2<br>diabetes +<br>CVD<br>(n=11,574) |
| <b>Oily fish</b>            | 103,648                     | 113,059            | 4,057                                         | 11,530                                    |
| Never                       | 10.6                        | 9.8                | 12.7                                          | 11.1                                      |
| Less than once a week       | 35.3                        | 30.2               | 31.9                                          | 30.6                                      |
| Once a week                 | 38.1                        | 38.8               | 35.3                                          | 37.1                                      |
| 2-4 times a week            | 15.3                        | 20.1               | 18.3                                          | 20.0                                      |
| 5-6 times a week            | 0.7                         | 0.8                | 1.2                                           | 0.9                                       |
| Once of more daily          | 0.2                         | 0.3                | 0.6                                           | 0.4                                       |
| <b>Processed meat</b>       | 103,891                     | 113,330            | 4,061                                         | 11,554                                    |
| Never                       | 10.2                        | 7.9                | 8.6                                           | 6.4                                       |
| Less than once a week       | 30.9                        | 29.6               | 27.2                                          | 25.0                                      |
| Once a week                 | 29.0                        | 29.7               | 28.1                                          | 29.6                                      |
| 2-4 times a week            | 26.2                        | 28.7               | 30.4                                          | 33.9                                      |
| 5-6 times a week            | 3.0                         | 3.3                | 4.3                                           | 4.1                                       |
| Once of more daily          | 0.7                         | 0.9                | 1.4                                           | 1.1                                       |
| <b>Poultry intake</b>       | 103,916                     | 113,349            | 4,069                                         | 11,551                                    |
| Never                       | 5.8                         | 4.0                | 5.1                                           | 3.7                                       |
| Less than once a week       | 10.4                        | 10.5               | 10.7                                          | 11.2                                      |
| Once a week                 | 36.0                        | 36.3               | 34.2                                          | 35.3                                      |
| 2-4 times a week            | 45.6                        | 46.9               | 46.8                                          | 47.1                                      |
| 5-6 times a week            | 1.9                         | 2.1                | 2.7                                           | 2.3                                       |
| Once of more daily          | 0.3                         | 0.3                | 0.5                                           | 0.4                                       |
| <b>Cheese intake</b>        | 102,188                     | 110,315            | 3,900                                         | 11,141                                    |
| Never                       | 2.1                         | 3.1                | 3.7                                           | 4.1                                       |
| Less than once a week       | 14.9                        | 18.5               | 23.2                                          | 21.2                                      |
| Once a week                 | 20.4                        | 22.4               | 23.1                                          | 24.7                                      |
| 2-4 times a week            | 47.3                        | 44.3               | 39.8                                          | 40.9                                      |
| 5-6 times a week            | 11.2                        | 8.5                | 7.6                                           | 6.3                                       |
| Once of more daily          | 4.0                         | 3.1                | 2.6                                           | 2.8                                       |
| <b>Salt intake</b>          | 103,979                     | 113,457            | 4,073                                         | 11,573                                    |
| Never/Rarely                | 56.5                        | 58.4               | 54.3                                          | 55.5                                      |
| Sometimes                   | 28.0                        | 26.3               | 28.7                                          | 28.0                                      |
| Usually                     | 11.3                        | 10.8               | 12.0                                          | 11.9                                      |
| Always                      | 4.2                         | 4.5                | 5.1                                           | 4.6                                       |
| <b>Non-oily fish intake</b> | 103,705                     | 113,135            | 4,055                                         | 11,516                                    |
| Never                       | 4.7                         | 4.0                | 5.7                                           | 4.8                                       |
| Less than once a week       | 29.9                        | 27.3               | 28.9                                          | 26.9                                      |
| Once a week                 | 49.8                        | 51.1               | 47.9                                          | 49.9                                      |
| 2-4 times a week            | 15.0                        | 16.8               | 16.4                                          | 17.6                                      |
| 5-6 times a week            | 0.5                         | 0.5                | 0.8                                           | 0.5                                       |
| Once of more daily          | 0.1                         | 0.2                | 0.2                                           | 0.3                                       |
| <b>Beef intake</b>          | 103,790                     | 113,154            | 4,057                                         | 11,534                                    |

|                                               |                |                |              |               |
|-----------------------------------------------|----------------|----------------|--------------|---------------|
| Never                                         | 11.6           | 9.3            | 12.1         | 9.3           |
| Less than once a week                         | 46.0           | 45.4           | 42.7         | 41.6          |
| Once a week                                   | 31.8           | 33.0           | 32.6         | 34.9          |
| 2-4 times a week                              | 10.5           | 12.0           | 12.2         | 13.7          |
| 5-6 times a week                              | 0.2            | 0.2            | 0.4          | 0.3           |
| Once of more daily                            | 0.1            | 0.1            | 0.1          | 0.1           |
| <b>Lamb/mutton intake</b>                     | <i>103,671</i> | <i>112,946</i> | <i>4,053</i> | <i>11,514</i> |
| Never                                         | 18.1           | 16.1           | 15.5         | 14.9          |
| Less than once a week                         | 58.1           | 56.2           | 52.8         | 51.8          |
| Once a week                                   | 21.1           | 24.4           | 26.2         | 28.4          |
| 2-4 times a week                              | 2.6            | 3.1            | 5.3          | 4.7           |
| 5-6 times a week                              | 0.1            | 0.1            | 0.1          | 0.1           |
| Once of more daily                            | 0.0            | 0.0            | 0.0          | 0.1           |
| <b>Pork intake</b>                            | <i>103,671</i> | <i>112,999</i> | <i>4,057</i> | <i>11,516</i> |
| Never                                         | 17.7           | 15.5           | 18.4         | 15.5          |
| Less than once a week                         | 58.4           | 56.7           | 51.9         | 51.8          |
| Once a week                                   | 20.8           | 24.0           | 24.6         | 27.5          |
| 2-4 times a week                              | 3.0            | 3.7            | 4.9          | 5.0           |
| 5-6 times a week                              | 0.1            | 0.1            | 0.1          | 0.2           |
| Once of more daily                            | 0.0            | 0.0            | 0.1          | 0.1           |
| <b>Milk type used</b>                         | <i>103,940</i> | <i>113,415</i> | <i>4,070</i> | <i>11,571</i> |
| Full cream                                    | 7.9            | 5.9            | 5.6          | 4.9           |
| Semi-skimmed                                  | 66.3           | 64.0           | 65.6         | 66.2          |
| Skimmed                                       | 18.1           | 21.9           | 21.4         | 22.2          |
| Soya                                          | 3.7            | 3.5            | 3.5          | 2.5           |
| Other type of milk                            | 1.0            | 1.2            | 0.8          | 1.1           |
| Never/rarely have milk                        | 3.1            | 3.5            | 3.2          | 3.1           |
| <b>Spread type</b>                            | <i>103,846</i> | <i>113,315</i> | <i>4,059</i> | <i>11,550</i> |
| Never/rarely use                              | 11.3           | 10.7           | 10.4         | 8.4           |
| Butter/spreadable                             | 39.5           | 33.0           | 28.3         | 29.9          |
| Flora pro active/benecol                      | 0.4            | 0.6            | 0.6          | 0.7           |
| Other type spread/marg                        | 48.8           | 55.7           | 60.7         | 61.1          |
| <b>Bread type</b>                             | <i>100,505</i> | <i>109,974</i> | <i>3,973</i> | <i>11,352</i> |
| White                                         | 24.2           | 27.9           | 23.8         | 29.7          |
| Brown                                         | 12.6           | 12.9           | 14.0         | 13.0          |
| Wholemeal/wholegrain                          | 59.7           | 55.3           | 58.1         | 53.7          |
| Other                                         | 3.5            | 3.9            | 4.2          | 3.6           |
| <b>Cereal type</b>                            | <i>85,959</i>  | <i>92,847</i>  | <i>3,479</i> | <i>9,744</i>  |
| Bran                                          | 17.1           | 16.7           | 16.1         | 16.9          |
| Biscuit (e.g. Weetabix)                       | 16.8           | 18.3           | 23.9         | 24.6          |
| Oat (porridge)                                | 23.9           | 26.8           | 29.2         | 29.0          |
| Muesli                                        | 23.7           | 18.4           | 14.7         | 12.5          |
| other                                         | 18.4           | 19.8           | 16.2         | 17.0          |
| <b>Never eat</b>                              | <i>103,848</i> | <i>113,190</i> | <i>4,039</i> | <i>11,527</i> |
| Eggs or foods containing eggs                 | 2.1            | 3.3            | 4.4          | 4.6           |
| Dairy products                                | 1.6            | 2.6            | 4.1          | 3.5           |
| Wheat products                                | 1.6            | 2.9            | 3.2          | 3.0           |
| <b>Does your diet vary from week to week?</b> | <i>103,701</i> | <i>113,167</i> | <i>4,052</i> | <i>11,534</i> |

|                                                                     |            |            |            |            |
|---------------------------------------------------------------------|------------|------------|------------|------------|
| Never/rarely                                                        | 38.0       | 32.3       | 29.8       | 27.6       |
| Sometimes                                                           | 55.1       | 58.8       | 59.9       | 61.8       |
| Often                                                               | 6.9        | 8.9        | 10.3       | 10.6       |
| <b>Bread intake (slices of bread each week)</b><br><i>mean (SD)</i> | 12.1 (8.5) | 12.7 (8.7) | 14.4 (9.8) | 14.6 (9.3) |
| <b>Cereal intake (bowls of cereal per week)</b> <i>mean (SD)</i>    | 4.5 (2.8)  | 4.4 (2.8)  | 4.8 (2.8)  | 4.5 (2.8)  |
